# Supplementary material for: Multi-compartment neuron–glia co-culture platform for localized CNS axon–glia interaction study
Source: Royal Society of Chemistry journal article supplement (doi:10.1039/c2lc40303j), 2012-01-01
Supplement: c2lc40303j.pdf [file c2lc40303j.pdf]

## Supplementary Information

### Title: Multi-Compartment Neuron-Glia Co-culture Platform for Localized CNS Axon-glia Interaction Study

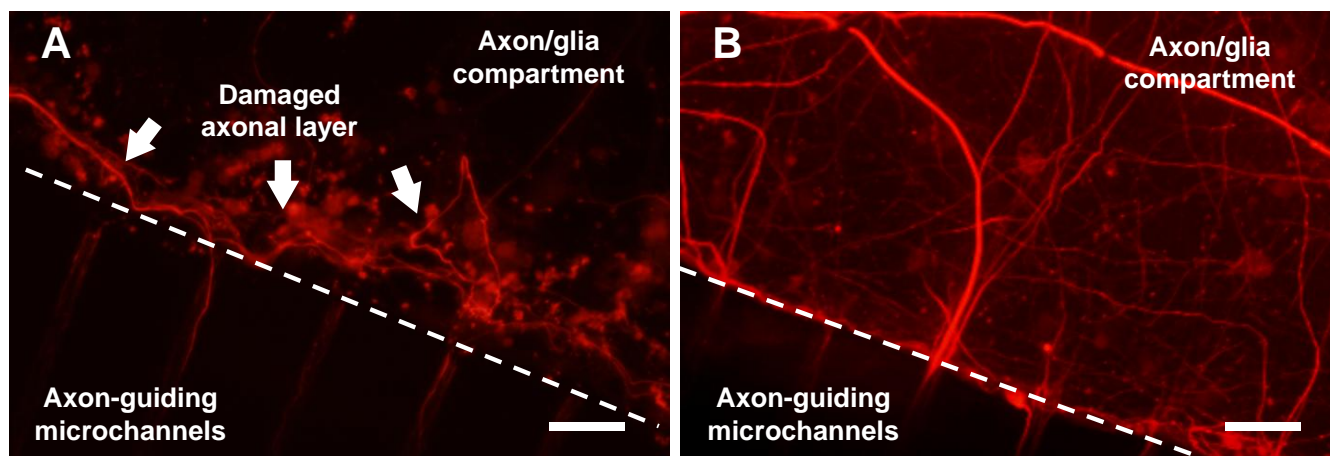

**Supplementary Fig. 1** Immunostained images of isolated axons inside the axon/glia compartment at DIV 27 (Stained for NF = red). (A) Isolated axons damaged by astrocytes ( $500 \text{ cells/mm}^2$ ) that have been added on top of pre-established axonal layer. Astrocytes grew underneath the axons and most pre-established axonal layer was lost and remaining axons were physically pushed toward the channel area after two weeks of co-culture. Neurons ( $500 \text{ cells/mm}^2$ ) were cultured for two weeks prior to adding astrocytes. (B) Isolated axon layer not co-cultured with astrocytes. No axonal damage can be observed and axons form uniform distribution inside the axon/glia compartment. The white dotted lines delineate compartment boundary. Scale bars =  $50 \mu\text{m}$ .
